# Supplementary material for: Logoterapi Viktor Frankl:Sebuah Refleksi Bagi Konseling Islam
Source: Royal Society of Chemistry journal article supplement (doi:10.1039/c9ra08285a), 2009-01-09
Supplement: c9ra08285a1.pdf [file c9ra08285a1.pdf]

## Electronic Supplementary Information

### Dynamic Halbach array magnet integrated microfluidic system for continuous-flow separation of rare tumor cells

Mei Xue,<sup>†a</sup> An Xiang,<sup>†b</sup> Yanhai Guo,<sup>b</sup> Li Wang,<sup>b</sup> Rou Wang,<sup>b</sup> Wenwen Wang,<sup>b</sup> Gang Ji<sup>c</sup> and Zifan Lu<sup>\*b</sup>

<sup>a</sup>Center for Translational Medicine, The First Affiliated Hospital of Xi'an Jiaotong University, Xi'an 710061, Shaanxi, People's Republic of China

<sup>b</sup>Department of biopharmaceutics, School of Pharmacy, Air Force Medical University (The Fourth Military Medical University), Xi'an 710032, Shaanxi, People's Republic of China. E-mail: luzfliuq@fmmu.edu.cn

<sup>c</sup>Xijing Hospital of Digestive Diseases, Xijing Hospital, Air Force Medical University (The Fourth Military Medical University), Xi'an 710032, Shaanxi, People's Republic of China

<sup>†</sup>These authors have contributed equally to this work.

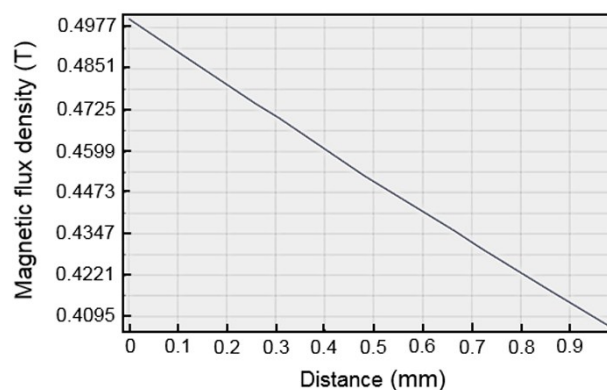

**Fig.S1** Plots of magnetic flux densities at the medial and lateral of the microchannel. A large magnetic field gradient is induced by the Halbach array magnet.

#### Supplementary movie captions:

**Movie S1.** Particle trajectories of magnetic beads in the microchannel. When the continuously moving magnetic field is applied, the magnetic beads move toward the medial wall of

microchannel under the continuous action of the magnetic force.

**Movie S2.** Particle trajectories of fluorescent particles in the microchannel. Fluorescent particles maintain their positions near the centre of microchannel and continuously flow under the continuous action of the drag force.
